# Supplementary material
Source: PubMed Central journal article supplement (PMC3562797)
Supplement: 1213317110_pnas.201213317SI.pdf [file 1213317110_pnas.201213317SI.pdf]

# Supporting Information

Kowalska et al. 10.1073/pnas.1213317110

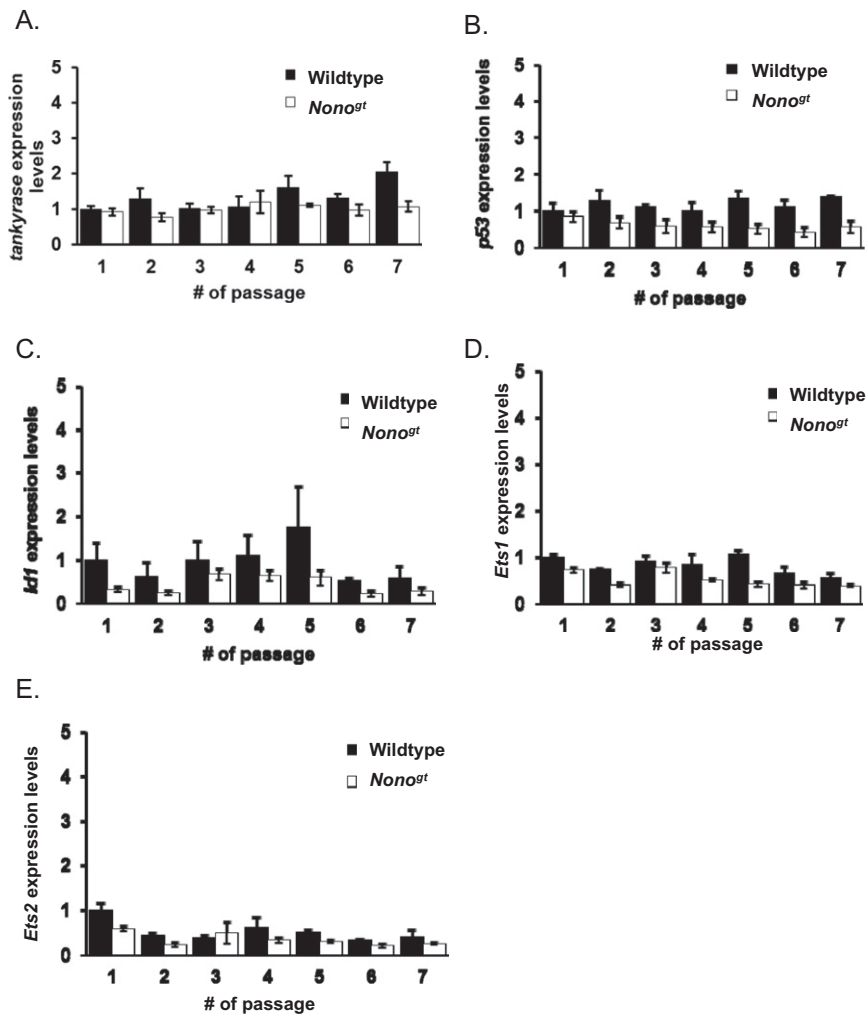

**Fig. S1.** Transcription of senescence-implicated genes in serially passaged WT and *Nono<sup>gt</sup>* primary fibroblasts. WT and *Nono<sup>gt</sup>* primary fibroblasts were counted and passaged every 2 d and a constant number of cells plated to a new dish. Total RNA was harvested from cells in each passage, and quantitative PCR (qPCR) was used to quantify the transcript levels of senescence-implicated genes *tankyrase* (A) and *p53* (B), as well as upstream regulators of *p16-Ink4A*, the genes *Id1* (C), *Ets1* (D), and *Ets2* (E). Values are plotted in arbitrary units relative to WT levels at passage 1.

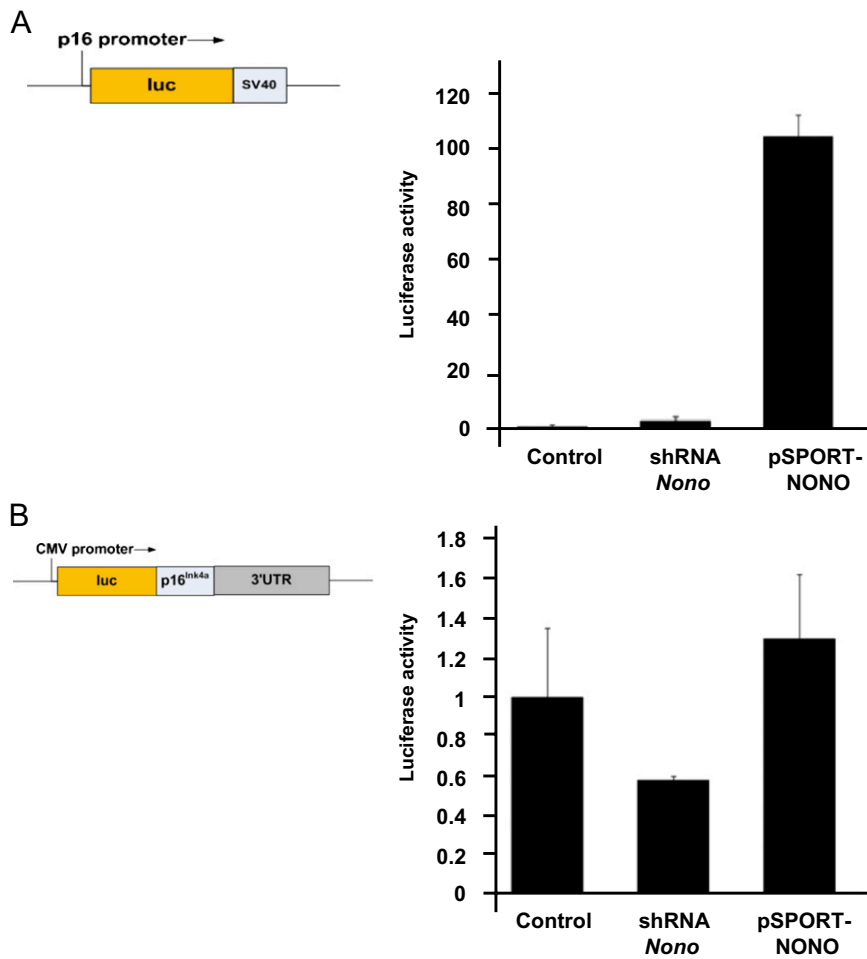

**Fig. 52.** NONO activates transcription of *p16-Ink4A* promoter reporters. (A) Relative expression levels of the diagrammed *p16-luc* promoter construct alone, in the presence of a NONO-targeting RNAi hairpin that reduces NONO levels 10-fold, and in the presence of a NONO-overexpressing vector. (B) Similar experiments using the diagrammed construct containing the *p16-Ink4A* 3' UTR.

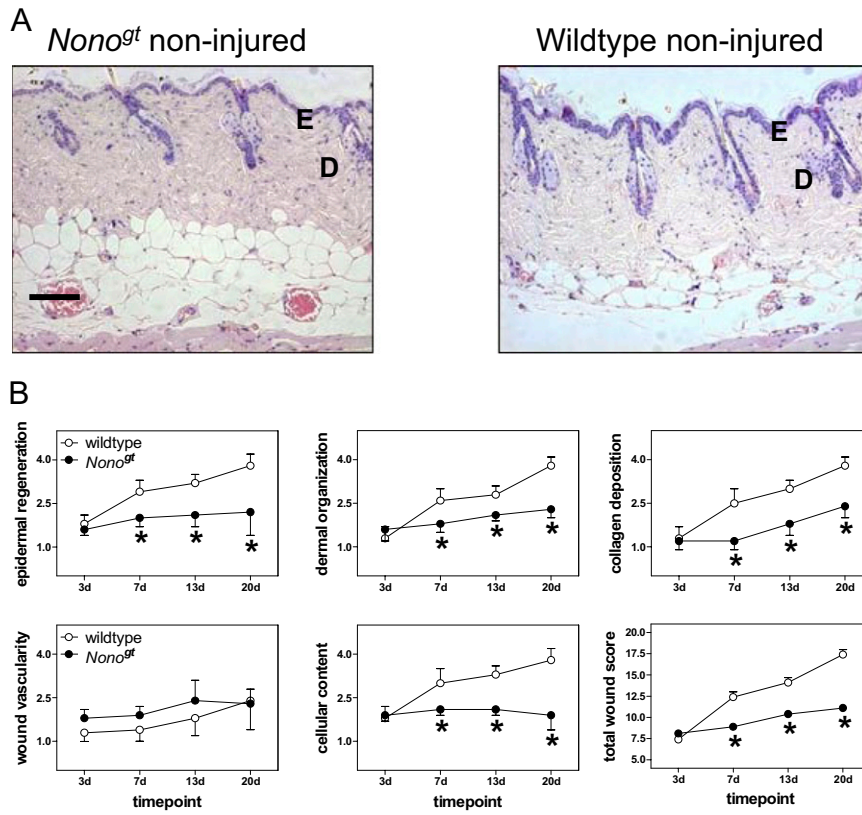

**Fig. S3.** Dermal structure and incisional wound healing in WT and *Nono<sup>gt</sup>* mice. (A) H&E-stained paraffin sections from uninjured dorsal skin. Normal skin morphogenesis is not affected in *Nono<sup>gt</sup>* mice compared with WT littermates (10–11 wk of age, 24 g body weight). (B) Full wound healing subscores of normal healing WT mice compared with *Nono<sup>gt</sup>* mice on day 3, 7, 13, and 20 after incisional wounding in the dorsal skinfold. Data represent means ± SD (*n* = 5).

**Table S1. Regulation of cell cycle genes in WT and *Nono*<sup>gt</sup> fibroblasts**

| Gene            | Fold difference, <i>gt</i> /WT |
|-----------------|--------------------------------|
| <i>Abl1</i>     | 2.11                           |
| <i>Ak1</i>      | 3.90                           |
| <i>Apbb1</i>    | 1.91                           |
| <i>Atm</i>      | 2.14                           |
| <i>Brca1</i>    | 3.09                           |
| <i>Brca2</i>    | 3.56                           |
| <i>Camk2a</i>   | 2.18                           |
| <i>Camk2b</i>   | 0.37                           |
| <i>Casp3</i>    | 2.67                           |
| <i>Ccna1</i>    | 0.37                           |
| <i>Ccna2</i>    | 19.68                          |
| <i>Ccnb1</i>    | 27.08                          |
| <i>Ccnb2</i>    | 10.26                          |
| <i>Ccnc</i>     | 5.27                           |
| <i>Ccnd1</i>    | 6.05                           |
| <i>Ccne1</i>    | 2.83                           |
| <i>Ccnf</i>     | 5.21                           |
| <i>Cdc25a</i>   | 2.58                           |
| <i>Cdk2</i>     | 12.98                          |
| <i>Cdk4</i>     | 4.51                           |
| <i>Cdk5rap1</i> | 2.78                           |
| <i>Cdkn1a</i>   | 1.57                           |
| <i>Cdkn1b</i>   | 3.44                           |
| <i>Cdkn2arf</i> | 1.85                           |
| <i>Chek1</i>    | 3.31                           |
| <i>Cks1b</i>    | 2.37                           |
| <i>Ddit3</i>    | 3.07                           |
| <i>Dnajc2</i>   | 1.73                           |
| <i>Dst</i>      | 1.12                           |
| <i>E2f1</i>     | 1.64                           |
| <i>E2f2</i>     | 0.37                           |
| <i>E2f3</i>     | 6.78                           |
| <i>E2f4</i>     | 1.70                           |
| <i>Gadd45a</i>  | 3.13                           |
| <i>Gpr132</i>   | 0.37                           |
| <i>Hus1</i>     | 3.04                           |
| <i>Inha</i>     | 0.82                           |
| <i>Itgb1</i>    | 1.81                           |
| <i>Macf1</i>    | 2.72                           |
| <i>Mad2l1</i>   | 2.93                           |
| <i>Mcm2</i>     | 7.62                           |
| <i>Mcm3</i>     | 9.82                           |
| <i>Mcm4</i>     | 5.67                           |
| <i>Mdm2</i>     | 2.94                           |
| <i>Mki67</i>    | 5.58                           |
| <i>Mre11a</i>   | 1.16                           |
| <i>Msh2</i>     | 1.57                           |
| <i>Mtbp</i>     | 4.46                           |
| <i>Myb</i>      | 0.17                           |
| <i>Nek2</i>     | 3.11                           |
| <i>Nfatc1</i>   | 2.82                           |
| <i>Notch2</i>   | 4.04                           |
| <i>Npm2</i>     | 1.06                           |
| <i>Pcna</i>     | 3.95                           |
| <i>Pes1</i>     | 2.48                           |
| <i>Pkd1</i>     | 1.93                           |
| <i>Pmp22</i>    | 1.74                           |
| <i>Ppm1d</i>    | 2.03                           |
| <i>Ppp2r3a</i>  | 0.90                           |
| <i>Ppp3ca</i>   | 1.86                           |
| <i>Prm1</i>     | 0.37                           |
| <i>Rad17</i>    | 3.17                           |

**Table S1. Cont.**

| Gene            | Fold difference, <i>gt</i> /WT |
|-----------------|--------------------------------|
| <i>Rad21</i>    | 2.38                           |
| <i>Rad51</i>    | 0.43                           |
| <i>Rad9</i>     | 2.66                           |
| <i>Ran</i>      | 3.18                           |
| <i>Rbl1</i>     | 0.94                           |
| <i>Rbl2</i>     | 1.04                           |
| <i>Sesn2</i>    | 1.53                           |
| <i>Sfn</i>      | 2.05                           |
| <i>Shc1</i>     | 5.39                           |
| <i>Skp2</i>     | 3.24                           |
| <i>Slfn1</i>    | 0.37                           |
| <i>Smc1a</i>    | 5.86                           |
| <i>Stag1</i>    | 3.45                           |
| <i>Sumo1</i>    | 3.45                           |
| <i>Taf10</i>    | 3.08                           |
| <i>Terf1</i>    | 2.62                           |
| <i>Tfdp1</i>    | 3.53                           |
| <i>Psmg2</i>    | 2.74                           |
| <i>Trp53</i>    | 3.18                           |
| <i>Trp63</i>    | 0.15                           |
| <i>Tsg101</i>   | 1.25                           |
| <i>Wee1</i>     | 1.23                           |
| <i>Gusb</i>     | 5.23                           |
| <i>Hprt1</i>    | 0.01                           |
| <i>Hsp90ab1</i> | 3.04                           |
| <i>Gapdh</i>    | 2.53                           |
| <i>Actb</i>     | 2.77                           |

Total RNA was harvested from dividing cultures of WT and *Nono<sup>gt</sup>* primary fibroblasts and subjected to qPCR array analysis. All array targets are shown, with fold-regulation of *Nono<sup>gt</sup>* vs. WT fibroblasts. Note that the p16-*Ink4A* transcript itself was not probed on this commercial array. Independent qPCR analysis using the primers in Table S2 confirmed fivefold reduction in expression of p16-*Ink4A* in *Nono<sup>gt</sup>* vs. WT fibroblasts in both replicates of the cellular RNA used for this array.

**Table S2. Primer sequences**

| Gene             | Orientation | Sequence (5'–3')                                    |
|------------------|-------------|-----------------------------------------------------|
| <i>Ets1</i>      | Sense       | CGG CAT CAT AGC ACA GTT CAA G                       |
| <i>Ets1</i>      | Antisense   | CCC ATG CAA ACG GCT TTT AT                          |
| <i>Ets1</i>      | Probe       | FAM-AAC CGC TAC CCG AAA CAT GGA AGA CTC<br>AG-TAMRA |
| <i>Id1</i>       | Primer Set  | 1) Assay ID: Mm00775963_g1                          |
| <i>Ets2</i>      | Primer Set  | 1) Assay ID: Mm00468972_m1                          |
| <i>NONO</i>      | Sense       | TGC GCT TCG CCT GTC A                               |
| <i>NONO</i>      | Antisense   | GCA GTT CGT TCG ACA GTA CTG                         |
| <i>NONO</i>      | Probe       | FAM-AGT GCA CCC TTA CAG TCC GCA ACC<br>TT-TAMRA     |
| <i>qPCR</i>      |             |                                                     |
| <i>p16-Ink4A</i> | Sense       | CCC AAC GCC CCG AAC T                               |
| <i>p16-Ink4A</i> | Antisense   | GTG AAC GTT GCC CAT CAT CA                          |
| <i>p16-Ink4A</i> | Probe       | FAM-TTT CGG TCG TAC CCC GAT TCA GG-TAMRA            |
| <i>ChIP</i>      |             |                                                     |
| <i>p16-Ink4A</i> | Sense       | TTT CGC CCA ACG CCC CGA A                           |
| <i>p16-Ink4A</i> | Antisense   | ACC CGA CTG CAG ATG GGA CAC                         |
| <i>p16-Ink4A</i> | Probe       | FAM- CGA ACT CTT TCG GTC GTA CCC CGA<br>TTC-TAMRA   |
| <i>p53</i>       | Sense       | GCA TCC CGT CCC CAT CA                              |
| <i>p53</i>       | Antisense   | GGA TTG TGT CTC AGC CCT GAA G                       |
| <i>p53</i>       | Probe       | FAM-CAG CCT CCC CCT CTC CTT GCT GTC<br>TTA-TAMRA    |
| <i>Tankyrase</i> | Sense       | CGG CAG CAG AGC AGA AGA C                           |
| <i>Tankyrase</i> | Antisense   | TGT ACT CCA GTT GCA GGT TTG AAT                     |
| <i>Tankyrase</i> | Probe       | TAG TGA CCA CCC CTG GTA AAG GCC AGA-TAMRA           |
| <i>GAPDH</i>     | Sense       | CAT GGC CTT CCG TGT TCC TA                          |
| <i>GAPDH</i>     | Antisense   | CCT GCT TCA CCA CCT TCT TGA                         |
| <i>GAPDH</i>     | Probe       | YAK-CCG CCT GGA GAA ACC TGC CAA GTA<br>TG-TAMRA     |

TaqMan Gene Expression Assays from Applied Biosystems are tested, but sequences are not provided. Assay consists of primer forward, primer reverse, and probe, as usual.

**Table S3. Histological wound healing scores**

| Score | Dermal organization                                              | Epidermal regeneration                             | Collagen deposition                    | Cellular content                                                                   | Wound vascularity                |
|-------|------------------------------------------------------------------|----------------------------------------------------|----------------------------------------|------------------------------------------------------------------------------------|----------------------------------|
| 1     | 25% thickness of granulation tissue compared with healthy tissue | No epithelial closure                              | Gap without ingrowing collagen fibrils | Low cell proliferation, mainly inflammatory cells                                  | 1–3 capillaries per visual field |
| 2     | 50% thickness of granulation tissue compared with healthy tissue | Strong hyperproliferative epithelium               | Gap with ingrowing collagen fibrils    | Predominantly inflammatory cells or dysfunctional fibroblasts, hyper-proliferation | 4–6 capillaries per visual field |
| 3     | 75% thickness of granulation tissue compared with healthy tissue | Moderate hyperproliferative epithelium             | No gap, but unstable adhesion          | Predominantly normal fibroblasts                                                   | 7–9 capillaries per visual field |
| 4     | Thickness of granulation tissue equal to healthy tissue          | Thickness and structure equal to normal epithelium | No gap, stable adhesion                | Low cell proliferation, mainly fibroblasts                                         | >9 capillaries per visual field  |
